# Supplementary material
Source: bioRxiv or medRxiv preprint supplement (https://www.medrxiv.org/highwire/filestream/77509/field_highwire_adjunct_files/1/2020.04.10.20058222-2.pdf)
Supplement: Supplementary file [file 2020.04.10.20058222-2.pdf]

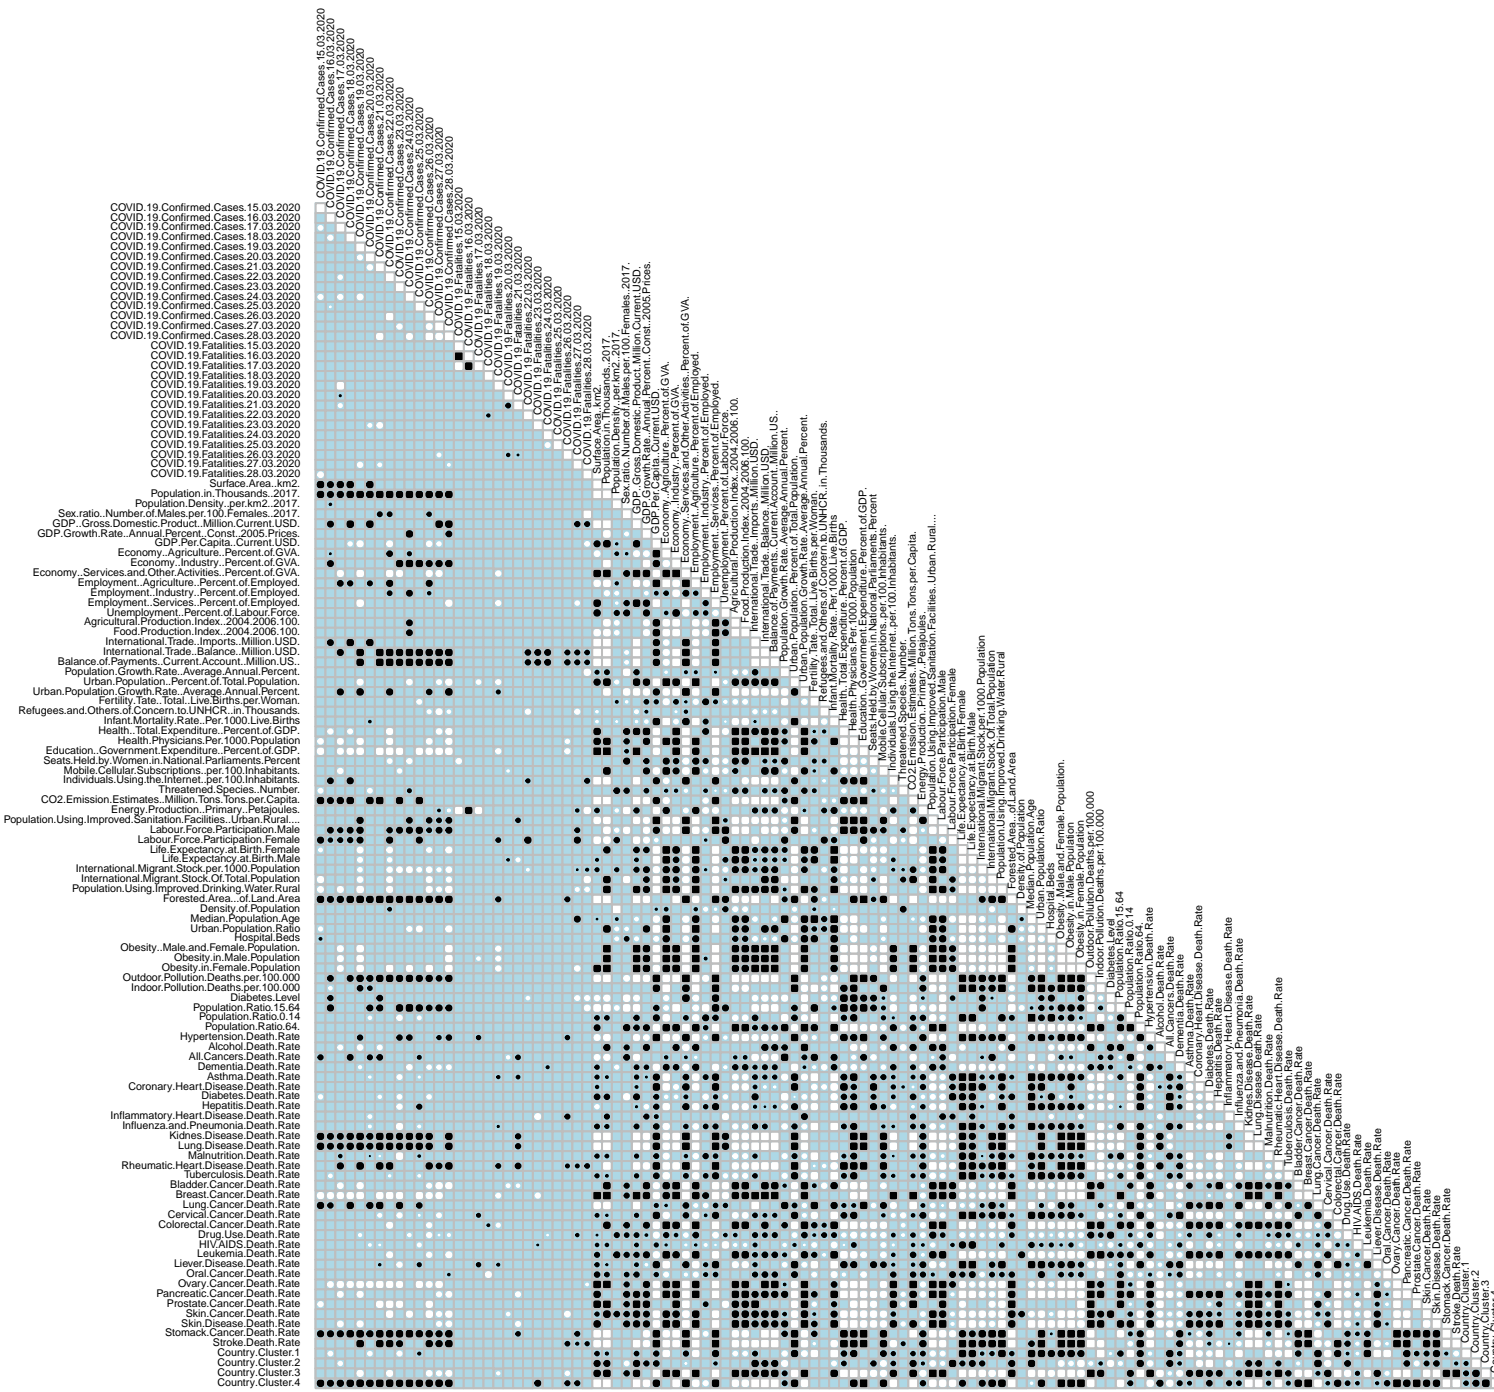

-1

0

1
